# Supplementary material for: Determinants of COVID-19 Vaccination Decision-Making Behaviors among Pregnant Women in Sub-Saharan Africa: A Scoping Review
Source: MDPI journal article supplement (doi:10.3390/vaccines11071233), 2023-07-12
Supplement: s1 [file s1]

## Supplementary Materials

**Table S1.** The complete inclusion and exclusion criteria .

| PECO                | Inclusion Criteria                                                                                                                                             | Exclusion criteria                                                                  |
|---------------------|----------------------------------------------------------------------------------------------------------------------------------------------------------------|-------------------------------------------------------------------------------------|
| Population/ Problem | Must include pregnant women, studies about COVID-19 vaccination,                                                                                               | Participants do not include pregnant individuals                                    |
| Exposure            | Studies examining vaccine issues (new vaccine, scheduling), psychological factors (attitudes, beliefs), and contextual determinants (policies, misinformation) | Studies examining clinical or biological determinants only                          |
| Context             | Studies must be conducted in Sub-Saharan Africa                                                                                                                | Studies among African women residing in other countries                             |
| Outcome             | Vaccination intention, hesitancy/ acceptance, uptake                                                                                                           |                                                                                     |
| Types of studies    | Observational studies, cross-sectional studies, clinical trials, case-control studies, cohort studies, qualitative studies                                     | Abstract-only publications, conference abstracts, reviews, commentaries, editorials |
| Time frame          | Published between March 2020 and January 2023                                                                                                                  |                                                                                     |

**Table S2.** Full electronic search Strategy for OVID-Medline search.

| Concepts                    | Search terms                                                                                                                                                                                                                                                                                                                                                                                                             |
|-----------------------------|--------------------------------------------------------------------------------------------------------------------------------------------------------------------------------------------------------------------------------------------------------------------------------------------------------------------------------------------------------------------------------------------------------------------------|
| <b>Pregnancy</b>            | "Pregnancy"[Mesh] OR "Pregnant Women"[Mesh]) OR "Prenatal Care"[Mesh] OR pregnan*, OR expectant* OR expecting* OR matern*                                                                                                                                                                                                                                                                                                |
| <b>COVID-19 vaccination</b> | "COVID-19 Vaccines"[Mesh] OR "COVID-19"[Mesh] OR "SARS-CoV-2"[Mesh]) OR "2019-nCoV Vaccine mRNA-1273"[Mesh] OR "ChAdOx1 nCoV-19"[Mesh] OR "BNT162 Vaccine"[Mesh]OR "Ad26COVS1"[Mesh] OR "covid-19 vaccin*" OR "Sars-cov-2 vaccin*" OR "SARS COV 2 vaccin*" OR "2019-nCoV Vaccine mRNA-1273" OR "BNT162 Vaccine" OR "Ad26COVS1" OR ("COVID 19 virus vaccin*" OR ("ChAdOx1 nCoV-19" OR "coronavirus disease 2019 vaccin*") |
| <b>Sub-Saharan Africa</b>   | "Africa South of the Sahara"[Mesh] OR "Africa, Western"[Mesh] OR "Africa, Southern"[Mesh] OR "Africa, Eastern"[Mesh] OR "Africa, Central"[Mesh] OR "Africa"[Mesh] OR "Developing Countries"                                                                                                                                                                                                                              |
| <b>Language</b>             | English                                                                                                                                                                                                                                                                                                                                                                                                                  |
| <b>Date of publication</b>  | 2020:3000                                                                                                                                                                                                                                                                                                                                                                                                                |

\*Truncation wildcard used to find word endings for example vaccin\* was used to find “vaccine”, “vaccines”, “vaccination”, or “vaccinated”

**Table S3.** Risk of Bias Assessment using the Joanna Briggs Institute (JBI) Critical Appraisal Checklist for Cohort Studies.

|              | <b>Naqvi et al., 2021</b>                                                                                  | <b>Yes</b> | <b>No</b>                    | <b>Unclear</b> |
|--------------|------------------------------------------------------------------------------------------------------------|------------|------------------------------|----------------|
| 1            | Were the two groups similar and recruited from the same population?                                        | ✓          |                              |                |
| 2            | Were the exposures measured similarly to assign people to both exposed and unexposed groups?               |            |                              | ??             |
| 3            |                                                                                                            |            |                              |                |
| 4            | Was the exposure measured in a valid and reliable way?                                                     | ✓          |                              |                |
| 5            | Were confounding factors identified?                                                                       | ✓          |                              |                |
| 6            | Were strategies to deal with confounding factors stated?                                                   |            | X                            |                |
| 7            | Were the groups/participants free of the outcome at the start of the study (or at the moment of exposure)? | ✓          |                              |                |
| 8            | Were the outcomes measured in a valid and reliable way?                                                    | ✓          |                              |                |
| 9            | Was the follow up time reported and sufficient to be long enough for outcomes to occur?                    | ✓          |                              |                |
| 10           | Was follow up complete, and if not, were the reasons to loss to follow up described and explored?          |            |                              | ??             |
| 11           | Were strategies to address incomplete follow up utilized?                                                  |            |                              | ??             |
| 12           | Was appropriate statistical analysis used?                                                                 | ✓          |                              |                |
| <b>Total</b> |                                                                                                            | <b>58%</b> | <b>Moderate risk of bias</b> |                |

Note: The risk of bias was ranked as high when the study reached up to 49% of “yes” scores, moderate when the study reached from 50 to 69% of “yes” scores, and low when the study reached more than 70% of “yes” scores. ‘✓’ indicates yes, ‘X’ indicates no and ‘?’ indicates unclear.

**Table S4.** Risk of Bias Assessment using the Joanna Briggs Institute (JBI) Critical Appraisal Checklist for Cross-Sectional Studies.

| Studies            | 1. Were the criteria for inclusion in the sample clearly defined? | 2. Were the study subjects and the setting described in detail? | 3. Was the exposure measured in a valid and reliable way? | 4. Were objective, standard criteria used for measurement of the condition? | 5. Were confounding factors identified? | 6. Were strategies to deal with confounding factors stated? | 7. Were the outcomes measured in a valid and reliable way? | 8. Was appropriate statistical analysis used? | % Yes | Risk of bias |
|--------------------|-------------------------------------------------------------------|-----------------------------------------------------------------|-----------------------------------------------------------|-----------------------------------------------------------------------------|-----------------------------------------|-------------------------------------------------------------|------------------------------------------------------------|-----------------------------------------------|-------|--------------|
| Amiebenomo, 2023   | ✓                                                                 | ✓                                                               | ?                                                         | ✓                                                                           | ?                                       | ×                                                           | ✓                                                          | ✓                                             | 63%   | Moderate     |
| Aynalem ZB, 2022   | ✓                                                                 | ✓                                                               | ✓                                                         | ✓                                                                           | ?                                       | ✓                                                           | ✓                                                          | ✓                                             | 88%   | Low          |
| Chekol Abebe, 2022 | ✓                                                                 | ✓                                                               | ✓                                                         | ✓                                                                           | ?                                       | ?                                                           | ✓                                                          | ✓                                             | 75%   | Low          |
| Gunawardhana, 2022 | ✓                                                                 | ✓                                                               | ✓                                                         | ✓                                                                           | ✓                                       | ✓                                                           | ✓                                                          | ✓                                             | 100%  | Low          |
| Hailemariam, 2021  | ✓                                                                 | ?                                                               | ✓                                                         | ✓                                                                           | ?                                       | ✓                                                           | ✓                                                          | ✓                                             | 75%   | Low          |
| Iliyasu, 2022      | ×                                                                 | ×                                                               | ✓                                                         | ✓                                                                           | ?                                       | ✓                                                           | ✓                                                          | ✓                                             | 63%   | Moderate     |
| Mose, 2021         | ✓                                                                 | ✓                                                               | ✓                                                         | ✓                                                                           | ?                                       | ?                                                           | ✓                                                          | ✓                                             | 75%   | Low          |
| Taye, 2022         | ✓                                                                 | ✓                                                               | ?                                                         | ✓                                                                           | ?                                       | ✓                                                           | ✓                                                          | ✓                                             | 75%   | Low          |

Note: The risk of bias was ranked as high when the study reached up to 49% of “yes” scores, moderate when the study reached from 50 to 69% of “yes” scores, and low when the study reached more than 70% of “yes” scores. ‘✓’ indicates yes, ‘×’ indicates no and ‘?’ indicates unclear.

**Table S5.** Risk of Bias Assessment using the Joanna Briggs Institute (JBI) Critical Appraisal Checklist for Qualitative Research.

|                                                                                                                                                    | Limaye, 2022 | Zavala, 2022 |
|----------------------------------------------------------------------------------------------------------------------------------------------------|--------------|--------------|
| 1. Is there congruity between the stated philosophical perspective and the research methodology?                                                   | ✓            | ✓            |
| 2. Is there congruity between the research methodology and the research question or objectives?                                                    | ✓            | ✓            |
| 3. Is there congruity between the research methodology and the methods used to collect data?                                                       | ✓            | ✓            |
| 4. Is there congruity between the research methodology and the representation and analysis of data?                                                | ?            | ?            |
| 5. Is there congruity between the research methodology and the interpretation of results?                                                          | ✓            | ✓            |
| 6. Is there a statement locating the researcher culturally or theoretically?                                                                       | ?            | ?            |
| 7. Is the influence of the researcher on the research, and vice- versa, addressed?                                                                 | ?            | ?            |
| 8. Are participants, and their voices, adequately represented?                                                                                     | ✓            | ✓            |
| 9. Is the research ethical according to current criteria or, for recent studies, and is there evidence of ethical approval by an appropriate body? | ✓            | ✓            |
| 10. Do the conclusions drawn in the research report flow from the analysis, or interpretation, of the data                                         | ✓            | ✓            |
| <b>Yes %</b>                                                                                                                                       | 70%          | 70%          |
| <b>Risk of Bias</b>                                                                                                                                | Low          | Low          |

Note: The risk of bias was ranked as high when the study reached up to 49% of “yes” scores, moderate when the study reached from 50 to 69% of “yes” scores, and low when the study reached more than 70% of “yes” scores. ‘✓’ indicates yes, ‘X’ indicates no and ‘?’ indicates unclear.

**Table S6.** Risk of Bias Assessment of Mixed Methods Study using MMAT criteria.

| Author, year     | Are there clear qualitative and quantitative research questions (or objectives*), or a clear mixed methods question (or objective*)? | Do the collected data allow address the research question (objective)? E.g., consider whether the follow-up period is long enough for the outcome to occur (for longitudinal studies or study components). | 5.1. Is the mixed methods research design relevant to address the qualitative and quantitative research questions (or objectives), or the qualitative and quantitative aspects of the mixed methods question (or objective)? | 5.2. Is the integration of qualitative and quantitative data (or results*) relevant to address the research question (objective)? | 5.3. Is appropriate consideration given to the limitations associated with this integration, e.g., the divergence of qualitative and quantitative data (or results*) in a triangulation design? | Score | Risk of bias |
|------------------|--------------------------------------------------------------------------------------------------------------------------------------|------------------------------------------------------------------------------------------------------------------------------------------------------------------------------------------------------------|------------------------------------------------------------------------------------------------------------------------------------------------------------------------------------------------------------------------------|-----------------------------------------------------------------------------------------------------------------------------------|-------------------------------------------------------------------------------------------------------------------------------------------------------------------------------------------------|-------|--------------|
| Aynalem BY, 2022 | ✓                                                                                                                                    | ✓                                                                                                                                                                                                          | ✓                                                                                                                                                                                                                            | ✓                                                                                                                                 | ?                                                                                                                                                                                               | 80%   | Low          |
| Ondieki, 2022    | ✓                                                                                                                                    | ✓                                                                                                                                                                                                          | ✓                                                                                                                                                                                                                            | ?                                                                                                                                 | ✓                                                                                                                                                                                               | 80%   | Low          |
| Tefera, 2022     | ✓                                                                                                                                    | ✓                                                                                                                                                                                                          | ✓                                                                                                                                                                                                                            | ✓                                                                                                                                 | ?                                                                                                                                                                                               | 80%   | Low          |

Notes: \*These two items are not considered as double-barreled items since in mixed methods research, (1) there may be research questions (quantitative research) or research objectives (qualitative research), and (2) data may be integrated, and/or qualitative findings and quantitative results can be integrated. The risk of bias was ranked as high when the study reached up to 49% of “yes” scores, moderate when the study reached from 50 to 69% of “yes” scores, and low when the study reached more than 70% of “yes” scores. ‘✓’ indicates yes, ‘X’ indicates no and ‘?’ indicates unclear.
